# Supplementary material for: Time-Resolved Analysis of N-RNA Interactions during RVFV Infection Shows Qualitative and Quantitative Shifts in RNA Encapsidation and Packaging
Source: MDPI journal article supplement (doi:10.3390/v13122417), 2021-12-02
Supplement: s1 [file s1]

**Title**

Time-resolved analysis of N-RNA interactions during RVFV infection shows qualitative and quantitative shifts in RNA encapsidation and packaging

Miyuki Hayashi, Eric P. Schultz, Jean-Marc Lanchy, and J. Stephen Lodmell

**Supplementary Figures and Tables**

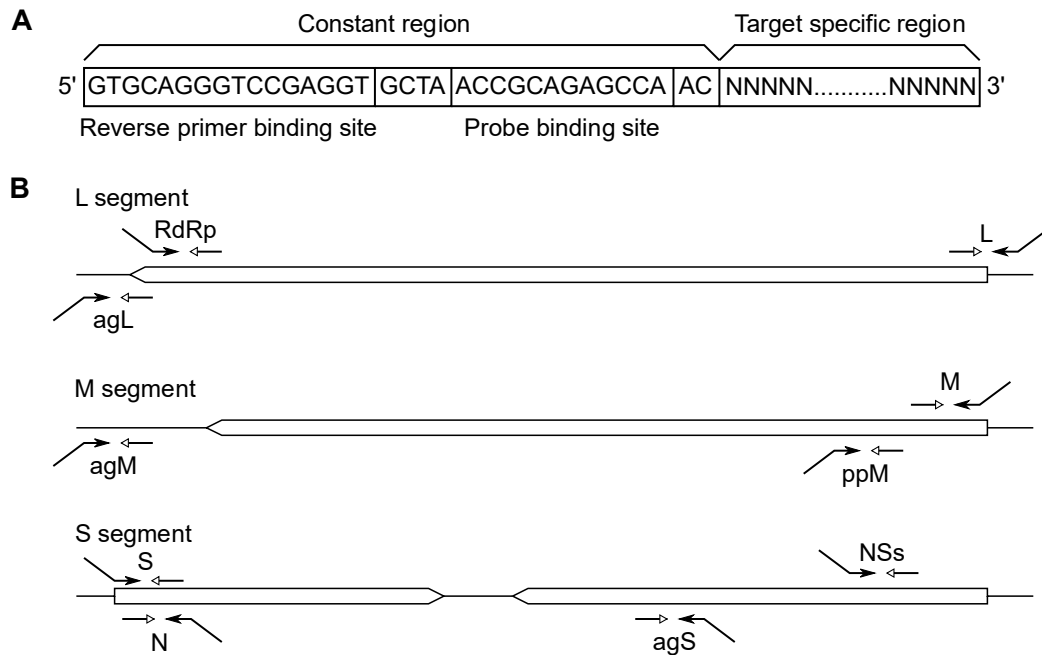

**Figure S1:** Stranded RT-qPCR primer design. (A) The design of the reverse transcription (RT) primer used in this study. Appending a constant region to an RT primer is shown to eliminate the production of primer-independent complementary DNA (cDNA) products that may cause over estimation of the target transcript in the subsequent qPCR step [1]. During the preparation of this manuscript, the similar method has been developed and used by Tercero et al. [2,3]. The constant region was designed based on the sequence used by Chen et al. [4]. (B) The regions targeted by each primer.

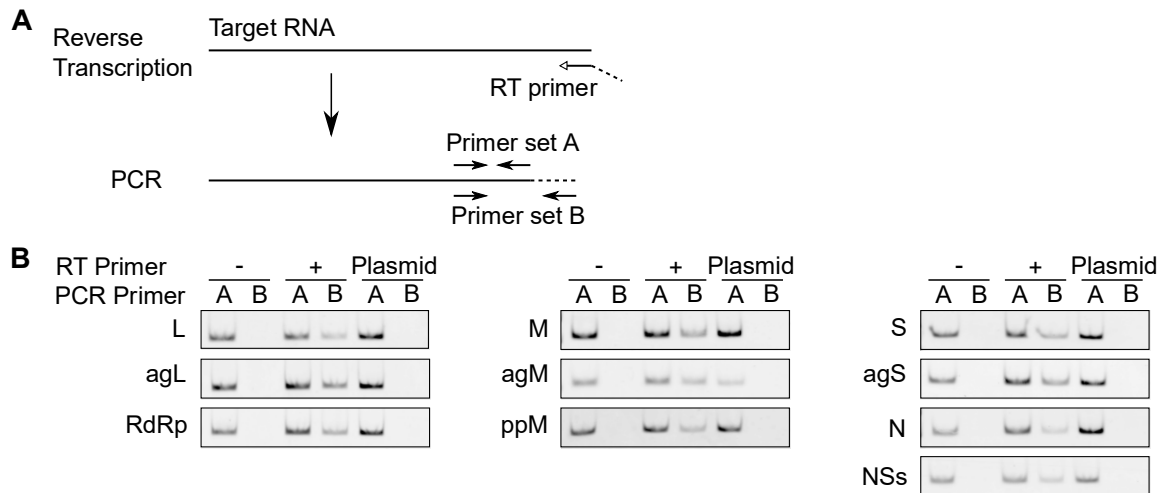

**Figure S2:** Appending the constant region eliminates the primer-independent cDNA synthesis. (A) The experimental set up. Target viral RNAs were purified from RVFV MP-12 infected HEK293 cells. After RT reaction, the end-point PCR experiment was conducted by using two different primer sets. Both forward and reverse primers in Primer set A anneals to the viral RNA sequence, whereas the reverse primer in Primer set B anneals to the constant region of the RT primer (shown as a broken line). Primer set B is used in RT-qPCR experiments shown in this study. (B) Products of the end-point PCR reactions are visualized on non-denaturing acrylamide gels. Primer set A produced signal in absence of RT primer. Primer set B signal arises only when the strand-specific RT primer is added to the reaction.

**Table S1:** PCR primers used to prepare RT-qPCR standards. Target sequences were amplified from pTVT7-GS, -GM, and -GL plasmid by using the primers listed below. The bolded letters indicate the sequence recognized by T7 polymerase. L = genomic L segment, agL = antigenomic L segment, RdRp = RNA-dependent RNA polymerase, M = genomic M segment, agM = antigenomic M segment, ppM = polyprotein M, S = genomic S segment, agS = antigenomic S segment, NSs = nonstructural protein S, N = nucleocapsid protein.

| Target | Name     | Sequence                                             | Note               |
|--------|----------|------------------------------------------------------|--------------------|
| L      | T7-L_F   | <b>TAATACGACTCACTATAGGG</b> GGCAGCTGAATAGTTGACTTGTGG | -                  |
| L      | L_R      | ACACAAAGGCGCCCAATCA                                  | -                  |
| agL    | T7-agL_F | <b>TAATACGACTCACTATAGGG</b> GGATGCATTCATTCAGGATGCAAG | -                  |
| agL    | agL_R    | ACACAAAGACCGCCCAATATTG                               | -                  |
| RdRp   | RdRp_R   | CCACATGGATTCCAATACTAGC                               | Used with T7-agL_F |
| M      | T7-M_F   | <b>TAATACGACTCACTATAGGG</b> TGCTGAGTTGGCCATCACAC     | -                  |
| M      | M_R      | ACACAAAGACGGTGCATTAAATGT                             | -                  |
| agM    | T7-agM_F | <b>TAATACGACTCACTATAGGG</b> GCCTTAGGGCACCAAACCT      | -                  |
| agM    | agM_R    | ACACAAAGACCGGTGCAACT                                 | -                  |
| ppM    | ppM_T7_R | TGCAAAGGGCACAACCTCAT                                 | Used with T7-agM_F |
| S      | T7-S_F   | <b>TAATACGACTCACTATAGGG</b> ACACAAAGACCCCCCTAGTGC    | -                  |
| S      | S_R      | ACACAAAGCTCCCTAGAGATACAA                             | -                  |
| NSs    | NSs_R    | GGCAGCCTTAACCTCTAATCAACC                             | Used with T7-S_F   |
| agS    | T7-agS_F | <b>TAATACGACTCACTATAGGG</b> ACACAAAGCTCCCTAGAGATACAA | -                  |
| agS    | agS_R    | ACACAAAGACCCCCCTAGTGC                                | -                  |
| N      | N_R      | CTAATCCCGACCGTAACCCC                                 | Used with T7-agS_F |

**Table S2:** RT and qPCR primers used in this study. Bolded letters indicate the constant region on the RT primer. [+C] indicates locked-nucleic acid base. The abbreviations used in the 'Target' column is the same as what's been used in Table 1.

| Target | Name        | Sequence                                                          |
|--------|-------------|-------------------------------------------------------------------|
| L      | L_RT        | <b>GTGCAGGGTCCGAGGTGCTATCCGCAGAGCCAAC</b> GCTAACTCTGGCACTTCCAAC   |
| L      | L_F         | GAGCCTATTTTCAGATGCTCCTTGT                                         |
| agL    | agL_RT      | <b>GTGCAGGGTCCGAGGTGCTATCCGCAGAGCCAAC</b> ACACAAAGACCGCCCAATATTGT |
| agL    | agL_F       | GACCAGTAAGCAAAGTCAGGC                                             |
| RdRp   | RdRp_RT     | <b>GTGCAGGGTCCGAGGTGCTATCCGCAGAGCCAAC</b> TCCGCCACATCTGTCTCC      |
| RdRp   | RdRp_F      | CGGTGCTCCAGCAAAGACTA                                              |
| M      | M_RT        | <b>GTGCAGGGTCCGAGGTGCTATCCGCAGAGCCAAC</b> GGTGACTCCACTAACCCAGAG   |
| M      | M_F         | GAGGTCTTAACCTCTCTTATGCCTG                                         |
| agM    | agM_RT      | <b>GTGCAGGGTCCGAGGTGCTATCCGCAGAGCCAAC</b> ACACAAAGACCGGTGCAACT    |
| agM    | agM_F       | GCAGCAGTCTCAAGTGCTTG                                              |
| ppM    | ppM_RT      | <b>GTGCAGGGTCCGAGGTGCTATCCGCAGAGCCAAC</b> AGTGGAGTCACCAAAGCAGG    |
| ppM    | ppM_F       | TCGGTTCTGGTGTGTGAAGC                                              |
| S      | S_RT        | <b>GTGCAGGGTCCGAGGTGCTATCCGCAGAGCCAAC</b> CTTGCGATCCAGTTTGCTGC    |
| S      | S_F         | AAGCAAACCTCTCGGACCCAC                                             |
| agS    | agS_RT      | <b>GTGCAGGGTCCGAGGTGCTATCCGCAGAGCCAAC</b> AGGTTGCTCACGTACAGTGC    |
| agS    | agS_F       | CAGCATCAGGCTCTCCTCC                                               |
| N      | N_RT        | <b>GTGCAGGGTCCGAGGTGCTATCCGCAGAGCCAAC</b> AACTCTACGGGCATCAAACC    |
| N      | N_F         | ATCAAGAGCTTGCGATCCAG                                              |
| NSs    | NSs_RT      | <b>GTGCAGGGTCCGAGGTGCTATCCGCAGAGCCAAC</b> CACAACAGGGCCCAACCATA    |
| NSs    | NSs_F       | CAGAGTGGTCGTCGTGTTGT                                              |
| -      | RVFV_probe  | FAM-TGG[+C]T[+C]TG[+C]GGA-BHQ1                                    |
| -      | Universal_R | GTGCAGGGTCCGAGGT                                                  |

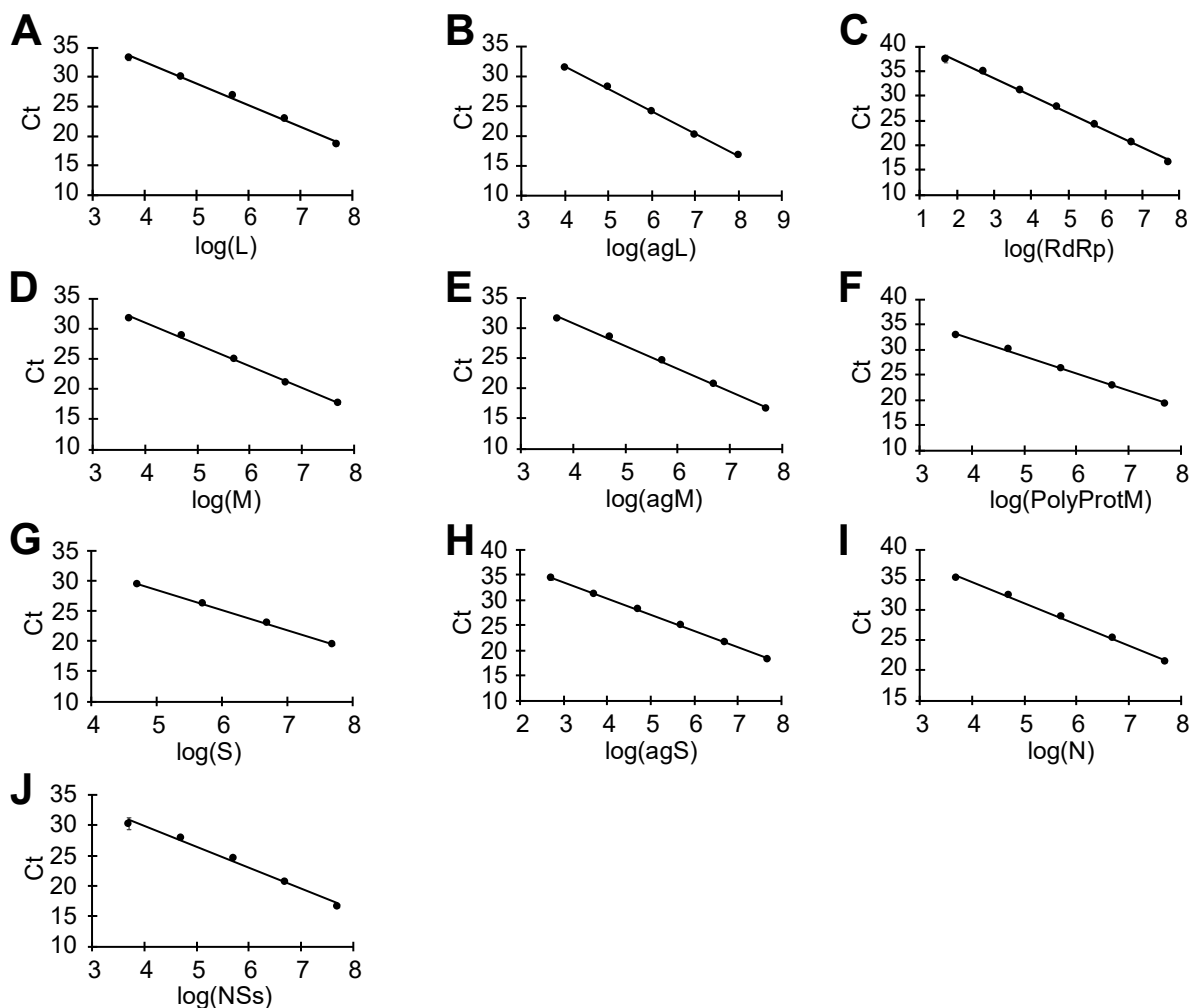

**K**

| Target    | Slope | y-Intercept | R <sup>2</sup> | Efficiency (%) |
|-----------|-------|-------------|----------------|----------------|
| L         | -3.66 | 47.17       | 0.994          | 87.74          |
| agL       | -3.73 | 46.47       | 0.998          | 97.92          |
| RdRp      | -3.51 | 44.10       | 0.997          | 92.59          |
| M         | -3.61 | 45.50       | 0.997          | 89.17          |
| agM       | -3.77 | 47.11       | 0.997          | 84.06          |
| PolyProtM | -3.30 | 42.60       | 0.986          | 100.72         |
| S         | -3.31 | 45.07       | 0.999          | 100.43         |
| agS       | -3.22 | 43.22       | 0.999          | 104.33         |
| N         | -3.50 | 48.68       | 0.997          | 93.04          |
| NSs       | -3.45 | 43.67       | 0.990          | 94.83          |

**Figure S3:** RT-qPCR standard curves and statistics. (A-J) Standard curves generated from dilutions of in vitro transcribed viral RNAs. The observed Ct values are plotted against raw copy numbers of input RNA. (K) Slope, y-intercept, R<sup>2</sup>, and qPCR efficiency of each primer set.

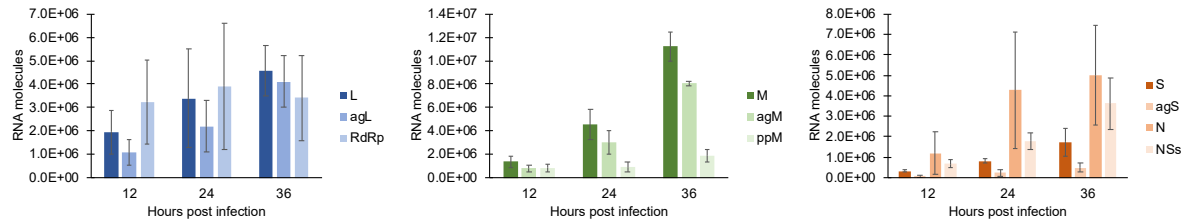

**Figure S4:** RT-qPCR quantitation of vRNAs purified from MP-12 infected HEK293 cells. Means and SEMs of two repeated experiments at cell passage numbers 2 and 6 are plotted. Each experiment had 2 or more biological replicates.

## References

1. Vashist, S.; Urena, L.; Goodfellow, I. Development of a strand specific real-time RT-qPCR assay for the detection and quantitation of murine norovirus RNA. *J Virol Methods* **2012**, *184*, 69-76, doi:10.1016/j.jviromet.2012.05.012.
2. Tercero, B.; Terasaki, K.; Nakagawa, K.; Narayanan, K.; Makino, S. A strand-specific real-time quantitative RT-PCR assay for distinguishing the genomic and antigenomic RNAs of Rift Valley fever phlebovirus. *J Virol Methods* **2019**, *272*, 113701, doi:10.1016/j.jviromet.2019.113701.
3. Tercero, B.; Narayanan, K.; Terasaki, K.; Makino, S. Characterization of the Molecular Interactions That Govern the Packaging of Viral RNA Segments into Rift Valley Fever Phlebovirus Particles. *J Virol* **2021**, *95*, e0042921, doi:10.1128/JVI.00429-21.
4. Chen, C.; Ridzon, D.A.; Broomer, A.J.; Zhou, Z.; Lee, D.H.; Nguyen, J.T.; Barbisin, M.; Xu, N.L.; Mahuvakar, V.R.; Andersen, M.R.; et al. Real-time quantification of microRNAs by stem-loop RT-PCR. *Nucleic Acids Research* **2005**, *33*, doi:10.1093/nar/gni178.
